# Supplementary material for: Differentiation of the C–O and C–C bond scission mechanisms of 1-hexadecanol on Pt(111) and Ru(0001): a first principles analysis
Source: Royal Society of Chemistry journal article supplement (doi:10.1039/c6cy02529c), 2017-01-01
Supplement: c6cy02529c1.pdf [file c6cy02529c1.pdf]

Supporting information

**Differentiation of C-O and C-C bond Scission Mechanism of  
1-Hexadecanol on Pt(111) and Ru(0001): A First Principles  
Analysis**

Meng-Ru Li <sup>1</sup> and Gui-Chang Wang<sup>\*,1,2</sup>

(<sup>1</sup> Department of Chemistry, Key Laboratory of Advanced Energy Materials  
Chemistry (Ministry of Education) and Collaborative Innovation Center of Chemical  
Science and Engineering (Tianjin), Nankai University, Tianjin 300071, P. R. China;

<sup>2</sup> State Key Laboratory of Coal Conversion, Institute of Coal Chemistry, Chinese  
Academy of Sciences, Taiyuan, 030001, P. R. China)

\*Corresponding author: Gui-Chang Wang. E-mail: [wanguichang@nankai.edu.cn](mailto:wanguichang@nankai.edu.cn)

Telephone: +86-22-23503824 (O) Fax: +86-22-23502458

## **Contents:**

**Table S1** the terms of partition functions applied in this work. For the molecules adsorbed on catalyst surface, as they are disabled to translate or rotate when treated as static bodies, only the vibrational and electronic terms of partition functions will be considered

**Table S2** Elementary reaction steps and kinetic parameters for Hexadecanol decomposition Reaction on Ru (0001) in this work

**Table S3** Elementary reaction steps and kinetic parameters for Hexadecanol decomposition Reaction on Pt (111) in this work

**Table S4** The calculated binding energies and the predicted binding energies of 1-Hexadecanol and its dehydrogenated intermediates on Pt (111) in this work

**Figure S1** Optimized configurations for the TSs involved in the side reaction on Pt (111) and Ru (0001)

**Table S1.** Partition Functions Applied in the Micro-kinetic Model of ethanol reactions

| type                    | Partition function                                                                                 |
|-------------------------|----------------------------------------------------------------------------------------------------|
| Translation             | $q^T = \left( \frac{2\pi m k_B T}{h^2} \right)^{3/2}$                                              |
| Rotational (linear)     | $q_{linear}^R = \frac{1}{\sigma} \frac{k_B T}{hB}$                                                 |
| Rotational (non-linear) | $q_{non-linear}^R = \frac{1}{\sigma} \left( \frac{k_B T}{hB} \right)^{3/2} \sqrt{\frac{\pi}{ABC}}$ |
| Vibration               | $q^V = \prod_i^{DF} \left( \frac{1}{1 - e^{-\frac{h\nu_i}{k_B T}}} \right)$                        |
| Electronic              | $q^E = (2S + 1) e^{-\frac{E_g}{k_B T}}$                                                            |
| Total                   | $q = q^T q^R q^V q^E$                                                                              |

Note:  $h$ ,  $V$  and  $\sigma$  refer to Plank's constant, the volume of the system and the symmetry factor, respectively.  $A$ ,  $B$  and  $C$  are rotational constants,  $\nu_i$  is denoted as the vibrational frequency of the  $i$ th mode,  $DF$  refers to the degree of freedoms,  $S$  is the total spin angular momentum,  $E_g$  is the electronic energy from the ground state.

**Table S2.** Elementary reaction steps and kinetic parameters for Hexadecanol decompositionReaction on Ru (0001) in this work <sup>a</sup>

| Reaction                                                                                               | $E_a$ / eV | $A$     | $E_a^{-1}$ / eV | $A^{-1}$ |
|--------------------------------------------------------------------------------------------------------|------------|---------|-----------------|----------|
| M1 $\text{RCH}_2\text{CH}_2\text{OH}(\text{g})^{*+} \rightarrow \text{RCH}_2\text{CH}_2\text{OH}^*$    | 0.00       | 6.15e2  | 1.66(1.78)      | 5.69e19  |
| M2 $\text{RCH}_2\text{CH}_2\text{OH}^{*+*} \rightarrow \text{RCH}_2\text{CH}_2\text{O}^* + \text{H}^*$ | 0.57(0.72) | 1.95e13 | 1.02(1.02)      | 2.75e13  |
| M3 $\text{RCH}_2\text{CH}_2\text{O}^{*+*} \rightarrow \text{RCH}_2\text{CHO}^* + \text{H}^*$           | 0.21(0.36) | 1.79e13 | 0.49(0.50)      | 1.81e13  |
| M4 $\text{RCH}_2\text{CHO}^{*+*} \rightarrow \text{RCH}_2\text{CO}^* + \text{H}^*$                     | 0.00(0.09) | 1.73e13 | 0.80(0.83)      | 1.81e13  |

|     |                                                                                     |            |         |            |         |
|-----|-------------------------------------------------------------------------------------|------------|---------|------------|---------|
| M5  | $\text{RCH}_2\text{CO}^* \rightarrow \text{RCHCO}^* + \text{H}^*$                   | 0.75(0.89) | 1.55e13 | 1.01(1.07) | 1.73e13 |
| M6  | $\text{RCHCO}^* \rightarrow \text{RCH}^* + \text{CO}^*$                             | 0.47(0.54) | 2.19e13 | 1.35(1.36) | 1.52e13 |
| M7  | $\text{CO}^* \rightarrow \text{CO}(\text{g}) + ^*$                                  | 1.86(1.97) | 5.85e17 | 0.00       | 1.81e3  |
| M8  | $\text{RCHCO}^* \rightarrow \text{RCHC}^* + \text{O}^*$                             | 0.85(0.85) | 1.16e13 | 2.42(2.42) | 2.28e13 |
| M9  | $\text{RCH}^* + \text{H}^* \rightarrow \text{RCH}_2^* + ^*$                         | 0.87(0.83) | 1.73e13 | 0.16(0.29) | 1.97e13 |
| M10 | $\text{RCH}_2^* + \text{H}^* \rightarrow \text{RCH}_3^* + ^*$                       | 0.85(0.85) | 2.07e13 | 0.80(0.96) | 2.16e13 |
| M11 | $\text{RCH}_3^* \rightarrow \text{RCH}_3(\text{g}) + ^*$                            | 0.70(0.71) | 4.52e19 | 0.00       | 6.57e2  |
| M12 | $\text{RCHC}^* + \text{H}^* \rightarrow \text{RCHCH}^* + ^*$                        | 0.43(0.45) | 1.68e13 | 0.00(0.15) | 1.66e13 |
| M13 | $\text{RCHCH}^* + \text{H}^* \rightarrow \text{RCH}_2\text{CH}^* + ^*$              | 0.34(0.38) | 1.66e13 | 0.00(0.11) | 1.72e13 |
| M14 | $\text{RCH}_2\text{CH}^* + \text{H}^* \rightarrow \text{RCH}_2\text{CH}_2^* + ^*$   | 0.43(0.43) | 1.60e13 | 0.12(0.26) | 1.65e13 |
| M15 | $\text{RCH}_2\text{CH}_2^* + \text{H}^* \rightarrow \text{RCH}_2\text{CH}_3^* + ^*$ | 1.03(1.03) | 1.66e13 | 0.74(0.91) | 1.73e13 |
| M16 | $\text{RCH}_2\text{CH}_3^* \rightarrow \text{RCH}_2\text{CH}_3(\text{g}) + ^*$      | 1.15(1.15) | 5.11e19 | 0.00       | 6.37e2  |
| M17 | $\text{CO}^* + \text{H}^* \rightarrow \text{HCO}^* + ^*$                            | 1.32(1.32) | 2.32e13 | 0.27(0.34) | 2.53e13 |
| M18 | $\text{HCO}^* + \text{H}^* \rightarrow \text{H}_2\text{CO}^* + ^*$                  | 0.50(0.50) | 2.11e13 | 0.13(0.21) | 2.48e13 |
| M19 | $\text{H}_2\text{CO}^* \rightarrow \text{CH}_2^* + \text{O}^*$                      | 1.10(1.14) | 2.19e13 | 1.46(1.46) | 2.86e13 |
| M20 | $\text{CH}_2^* + \text{H}^* \rightarrow \text{CH}_3^* + ^*$                         | 0.55(0.55) | 1.84e13 | 0.38(0.49) | 1.13e13 |
| M21 | $\text{CH}_3^* + \text{H}^* \rightarrow \text{CH}_4^* + ^*$                         | 0.72(0.72) | 3.08e13 | 0.75(0.90) | 4.98e12 |
| M22 | $\text{CH}_4^* \rightarrow \text{CH}_4(\text{g}) + ^*$                              | 0.38(0.42) | 1.01e16 | 0.00       | 2.39e3  |
| M23 | $2\text{H}^* \rightarrow \text{H}_2^* + ^*$                                         | 0.61(0.64) | 3.25e13 | 0.00(0.02) | 2.06e13 |
| M24 | $\text{H}_2^* \rightarrow \text{H}_2(\text{g}) + ^*$                                | 0.82(0.96) | 6.54e14 | 0.00       | 6.77e3  |
| M25 | $\text{O}^* + \text{H}^* \rightarrow \text{OH}^* + ^*$                              | 1.30(1.35) | 2.38e13 | 0.65(0.84) | 1.87e13 |
| M26 | $\text{OH}^* + \text{H}^* \rightarrow \text{H}_2\text{O}^* + ^*$                    | 0.94(0.99) | 2.24e13 | 0.77(0.96) | 1.34e13 |
| M27 | $\text{H}_2\text{O}^* \rightarrow \text{H}_2\text{O}(\text{g}) + ^*$                | 0.56(0.64) | 1.00e13 | 0.00       | 2.93e8  |

Note: The magnitude of pre-exponential factors (A) was estimated at 473 K and 1.00 MPa. <sup>a</sup> Entries in parentheses are the energies before ZPE correction.

**Table S3.** Elementary reaction steps and kinetic parameters for Hexadecanol decomposition Reaction on Pt(111) in this work <sup>a</sup>

| Reaction | $E_a$ / eV | A | $E_a^{-1}$ / eV | $A^{-1}$ |
|----------|------------|---|-----------------|----------|
|----------|------------|---|-----------------|----------|

|     |                                                                                                  |            |         |            |         |
|-----|--------------------------------------------------------------------------------------------------|------------|---------|------------|---------|
| M1  | $\text{RCH}_2\text{CH}_2\text{OH}(\text{g})+\ast\rightarrow\text{RCH}_2\text{CH}_2\text{OH}\ast$ | 0.00       | 6.15e2  | 1.34(1.45) | 5.69e19 |
| M2  | $\text{RCH}_2\text{CH}_2\text{OH}\ast+\ast\rightarrow\text{RCH}_2\text{CHOH}\ast+\text{H}\ast$   | 0.34(0.46) | 2.03e13 | 0.68(0.68) | 2.12e13 |
| M3  | $\text{RCH}_2\text{CHOH}\ast+\ast\rightarrow\text{RCH}_2\text{COH}\ast+\text{H}\ast$             | 0.42(0.66) | 1.53e13 | 0.33(0.40) | 1.38e13 |
| M4  | $\text{RCH}_2\text{COH}\ast+\ast\rightarrow\text{RCH}_2\text{C}\ast+\text{OH}\ast$               | 0.70(0.72) | 1.72e13 | 0.91(0.91) | 1.54e13 |
| M5  | $\text{RCH}_2\text{COH}\ast+\ast\rightarrow\text{RCH}_2\text{CO}\ast+\text{H}\ast$               | 0.18(0.40) | 1.35e13 | 0.75(0.79) | 1.35e13 |
| M6  | $\text{RCH}_2\text{CO}\ast+\ast\rightarrow\text{RCHCO}\ast+\text{H}\ast$                         | 1.36(1.47) | 1.75e13 | 0.48(0.62) | 2.06e13 |
| M7  | $\text{RCHCO}\ast+\ast\rightarrow\text{RCH}\ast+\text{CO}\ast$                                   | 0.98(1.01) | 3.95e13 | 0.81(0.82) | 1.34e13 |
| M8  | $\text{RCH}_2\text{C}\ast+\text{H}\ast\rightarrow\text{RCH}_2\text{CH}\ast+\ast$                 | 0.91(0.91) | 1.61e13 | 0.25(0.39) | 1.85e13 |
| M9  | $\text{RCH}_2\text{CH}\ast+\text{H}\ast\rightarrow\text{RCH}_2\text{CH}_2\ast+\ast$              | 0.45(0.51) | 1.16e13 | 0.96(1.17) | 1.78e13 |
| M10 | $\text{RCH}_2\text{CH}_2\ast+\text{H}\ast\rightarrow\text{RCH}_2\text{CH}_3\ast+\ast$            | 0.89(0.93) | 1.16e13 | 0.70(0.87) | 1.89e13 |
| M11 | $\text{RCH}\ast+\text{H}\ast\rightarrow\text{RCH}_2\ast+\ast$                                    | 0.70(0.70) | 1.57e13 | 0.98(1.14) | 1.96e13 |
| M12 | $\text{RCH}_2\ast+\text{H}\ast\rightarrow\text{RCH}_3\ast+\ast$                                  | 0.72(0.74) | 2.51e13 | 0.60(0.78) | 1.77e13 |
| M13 | $\text{RCH}_2\text{CH}_3\ast\rightarrow\text{RCH}_2\text{CH}_3(\text{g})+\ast$                   | 0.98(0.98) | 5.11e19 | 0.00       | 6.37e2  |
| M14 | $\text{RCH}_3\ast\rightarrow\text{RCH}_3(\text{g})+\ast$                                         | 1.49(1.49) | 4.52e19 | 0.00       | 6.57e2  |
| M15 | $2\text{H}\ast\rightarrow\text{H}_2\ast+\ast$                                                    | 1.12(1.12) | 2.28e13 | 0.30(0.33) | 5.11e12 |
| M16 | $\text{H}_2\ast\rightarrow\text{H}_2(\text{g})+\ast$                                             | 0.11(0.11) | 6.54e14 | 0.00       | 6.77e3  |

Note: The magnitude of pre-exponential factors (A) was estimated at 473 K and 1.00 MPa. <sup>a</sup> Entries in parentheses are the energies before ZPE correction.

**Table S4.** The calculated binding energies and the predicted binding energies of 1-Hexadecanol and its dehydrogenated intermediates in Figure 2 on Pt (111)

| species                            | binding energy (eV)       |                               |
|------------------------------------|---------------------------|-------------------------------|
|                                    | Pt(111), DFT <sup>a</sup> | Pt(111), Scaling <sup>b</sup> |
| $\text{RCH}_2\text{CH}_2\text{OH}$ | -0.25                     | -0.25                         |
| $\text{RCH}_2\text{CH}_2\text{O}$  | 0.88                      | 0.88                          |
| $\text{RCH}_2\text{CHOH}$          | 0.03                      | 0.03                          |
| $\text{RCHCH}_2\text{OH}$          | 0.22                      | 0.22                          |
| $\text{RCH}_2\text{CHO}$           | 0.77                      | 0.77                          |
| $\text{RCHCH}_2\text{O}$           | 1.08                      | 1.41                          |
| $\text{RCHCHOH}$                   | 0.45                      | 0.50                          |
| $\text{RCCH}_2\text{OH}$           | 1.14                      | 0.68                          |

---

|                      |      |      |
|----------------------|------|------|
| RCH <sub>2</sub> COH | 0.65 | 0.31 |
| RCHCHO               | 1.30 | 1.30 |
| RCH <sub>2</sub> CO  | 0.45 | 0.66 |
| RCCH <sub>2</sub> O  | 1.89 | 1.94 |
| RCCHOH               | 0.61 | 0.96 |
| RCHCOH               | 0.90 | 0.78 |
| RCCOH                | 1.00 | 1.24 |
| RCHCO                | 1.36 | 1.19 |
| RCCHO                | 1.74 | 1.83 |

---

Note: <sup>a</sup> refers to the calculated binding energies of the 1-Hexadecanol and its dehydrogenated intermediates in Figure 2 on Pt (111); <sup>b</sup> refers to the predicted binding energies of the 1-Hexadecanol and its dehydrogenated intermediates in Figure 2 on Pt (111)

**Pt:**

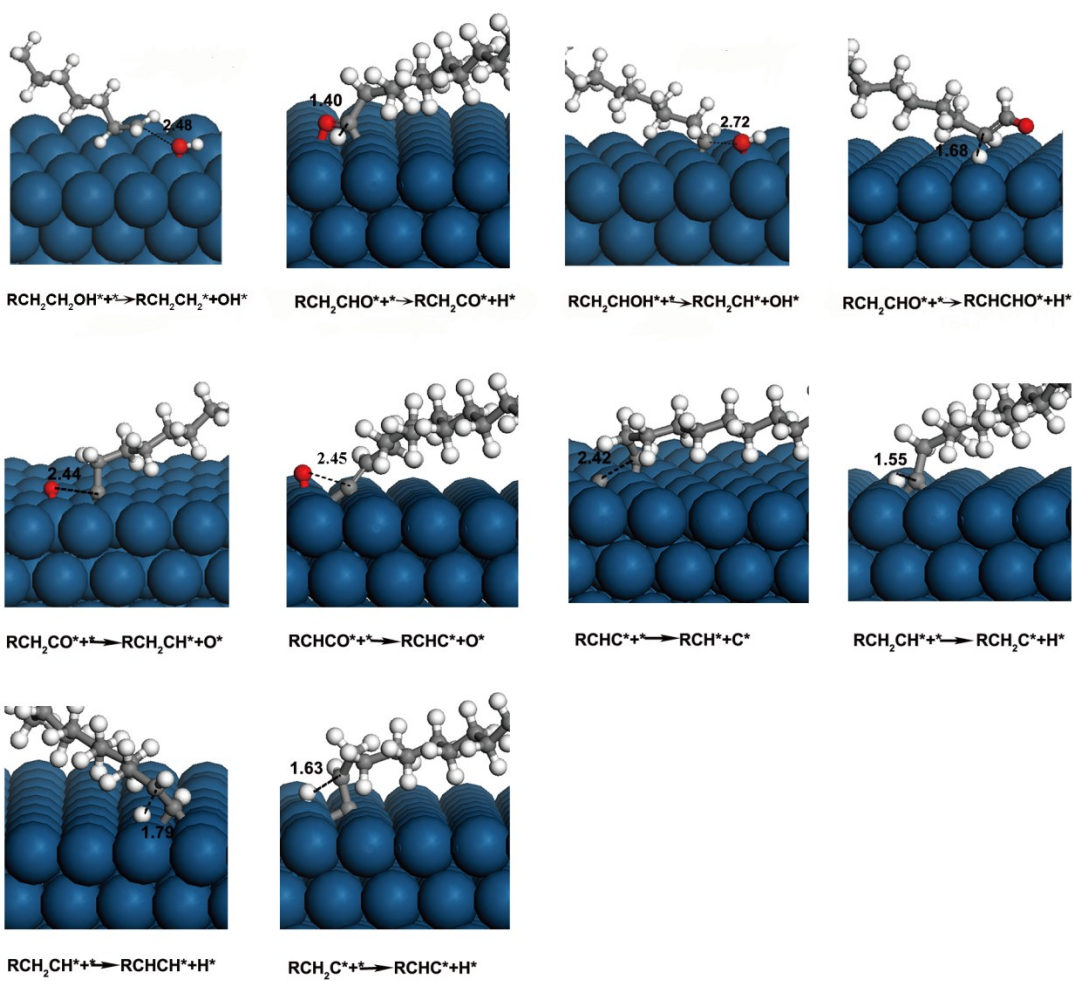

**Ru:**

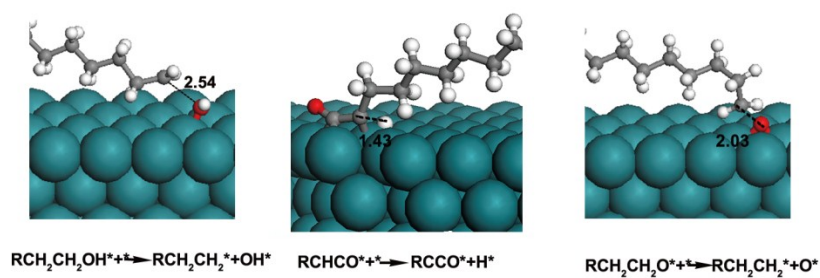

**Figure S1.** Optimized configurations for the TSs involved in the side reaction on Pt

(111) and Ru (0001).

Here  $\text{R}=\text{C}_{14}\text{H}_{29}$ .
